# Supplementary material for: ERVWE1 Reduces Hippocampal Neuron Density and Impairs Dendritic Spine Morphology through Inhibiting Wnt/JNK Non-Canonical Pathway via miR-141-3p in Schizophrenia
Source: MDPI journal article supplement (doi:10.3390/v15010168), 2023-01-05
Supplement: s1 [file s1]

# ERVWE1 Reduces Hippocampal Neuron Density and Impairs Dendritic Spine Morphology through Inhibiting Wnt/JNK Non-Canonical Pathway via miR-141-3p in Schizophrenia

Wei Yao <sup>1</sup>, Ping Zhou <sup>1</sup>, Qiu Jin Yan <sup>1</sup>, Xiulin Wu <sup>1</sup>, Yaru Xia <sup>1</sup>, Wenshi Li <sup>1</sup>, Xuhang Li <sup>1</sup>, Fan Zhu <sup>1,2,\*</sup>

<sup>1</sup> State Key Laboratory of Virology, Department of Medical Microbiology, School of Basic Medical Sciences, Wuhan University, Wuhan 430071, China

<sup>2</sup> Hubei Province Key Laboratory of Allergy & Immunology, Wuhan University, Wuhan 430071, China

\* Correspondence: fanzhu@whu.edu.cn or zhufan@hotmail.com

**Supplementary Table S1.** Comparison of blood mRNA samples demographic data between the normal control and recent-onset schizophrenia groups.

| Characteristics                    | Recent-Onset Schizophrenia (n = 18) | Normal Control (n = 25) | p Value |
|------------------------------------|-------------------------------------|-------------------------|---------|
| Age (years) <sup>a</sup>           | 43.22 ± 12.99                       | 43.96 ± 12.99           | 0.971   |
| Education (years) <sup>a</sup>     | 12.00 ± 3.40                        | 11.36 ± 4.07            | 0.648   |
| Height <sup>a</sup>                | 1.67 ± 0.86                         | 1.70 ± 0.88             | 0.252   |
| BMI (body mass index) <sup>a</sup> | 23.32 ± 2.42                        | 22.00 ± 2.73            | 0.852   |
| Gender (F/M) <sup>b</sup>          | 8/10                                | 12/13                   | 1.000   |
| Smokers (N, n%) <sup>b</sup>       | 9(50%)                              | 11(44%)                 | 0.763   |

Notes: All values are the means ± SD unless otherwise indicated.

<sup>a</sup>: p values were calculated by the Mann-Whitney U test.

<sup>b</sup>: p values were calculated by the chi-square test.

<sup>c</sup>: In this study, Smokers represents the number of people who have a habit of smoking.

**Supplementary Table S2.** Comparison of serum samples demographic data between the normal control and recent-onset schizophrenia groups.

| Characteristics                    | Recent-Onset Schizophrenia (n = 48) | Normal Control (n = 36) | p Value |
|------------------------------------|-------------------------------------|-------------------------|---------|
| Age (years) <sup>a</sup>           | 42.08 ± 12.68                       | 43.92 ± 12.41           | 0.516   |
| Education (years) <sup>a</sup>     | 11.54 ± 3.61                        | 11.11 ± 4.12            | 0.648   |
| Height <sup>a</sup>                | 1.68 ± 0.08                         | 1.70 ± 0.08             | 0.224   |
| BMI (body mass index) <sup>a</sup> | 21.71 ± 2.72                        | 22.14 ± 2.94            | 0.493   |
| Gender (F/M) <sup>b</sup>          | 22/26                               | 17/19                   | 0.899   |
| Smokers (N, n%) <sup>b</sup>       | 19 (39.58%)                         | 14 (38.89%)             | 0.949   |

Notes: All values are the means ± SD unless otherwise indicated.

<sup>a</sup>: p values were calculated by the Mann-Whitney U test.

<sup>b</sup>: p values were calculated by the chi-square test.

<sup>c</sup>: In this study, Smokers represents the number of people who have a habit of smoking.

**Supplementary Table S3.** Primer sequence for cloning and real-time PCR used in this study.

| Primer                   | Sequence (5'-3')                                                |
|--------------------------|-----------------------------------------------------------------|
| wnt5a-3UTR-F1            | ATAGCTAGCCTAAAGGTTTCATTGTGTT                                    |
| wnt5a-3UTR-R1            | ATATCTAGAAACTTGGTATTGGCAAAA                                     |
| wnt5a-mut-R2             | GTTTTTGCAATAAAGCGTCTCAGTCAATATACAAC                             |
| wnt5a-mut-F2             | CAGTTGTATATTGACTGAGACGCTTTATTGCAAAAAC                           |
| YY1-CDS-F                | ATACTCGAGATGGCCTCGGGCGACACC                                     |
| YY1-CDS-R                | ATAGGATCCTCACTGGTTGTTTTTGGC                                     |
| shYY1-F                  | GATCC GCCCTCATAAAGGCTGCACAA TTCAAGAGA<br>TTGTGCAGCCTTTATGAGGGCA |
| shYY1-R                  | AGCTT GCCCTCATAAAGGCTGCACAA TCTCTTGAA<br>TTGTGCAGCCTTTATGAGGGCG |
| shYY1-NC-F               | GATCCCCTTAGTTTTATGACCCAATTTCAAGAGAATT-<br>GGGTCATAAACTAAGGA     |
| shYY1-NC-R               | AGCTTCCTTAGTTTTATGACCCAATTCTCTTGAAATT-<br>GGGTCATAAACTAAGGG     |
| miR141pro-F              | ATAGCTAGCAGGGGTGAGACTAGGCAG                                     |
| miR141pro-R              | TATAAGCTTAGATCCCTGGCTCCCATC                                     |
| hsa-miR-141-3p mimic-F   | UAACACUGUCUGGUAAGAUGG                                           |
| hsa-miR-141-3p mimic-R   | CCATCTTTACCAGACAGTGTTA                                          |
| mimic-NC-F               | UUUGUACUACACAAAAGUACUG                                          |
| mimic-NC-R               | CAGTACTTTTGTGTAGTACAAA                                          |
| hsa-miR-141-3p inhibitor | CCATCTTTACCAGACAGTGTTA                                          |
| inhibitor-NC             | CAGUACUUUUGUGUAGUACAAA                                          |
| hsa-miR-129-5p inhibitor | GCAAGCCCAGACCGCAAAAAG                                           |
| hsa-miR-300 inhibitor    | AGAGAGAGTCTGCCCTTGTATA                                          |
| ERVWE1-F                 | CCATGCCGCTGTATGACCAG                                            |
| ERVWE1-R                 | GGGTTCCCTTAGAAAGACTCCT                                          |
| GAPDH-F                  | GGAGCGAGATCCCTCCAAAAT                                           |
| GAPDH-R                  | GGCTGTTGTCATACTTCTCATGG                                         |
| CCNL2-F                  | GTACTCCGGGGTGCTCATC                                             |
| CCNL2-R                  | GAGGTCGGTCTCTGTGTCTG                                            |
| ACOT7-F                  | TCTCCCATGTGCATCGGTG                                             |
| ACOT7-R                  | TTTTCGGACATCACGTTGACC                                           |

**Supplementary Table S4.** Antibodies and the dilutions.

| Proteins                       | Brands         | Catalogs         | Dilutions                   |
|--------------------------------|----------------|------------------|-----------------------------|
| ERVWE1                         | Abcam          | ab179693         | 1:1000 (WB), 1:100 (IP, IF) |
| Wnt5a                          | Abcam          | ab229200         | 1:1000 (WB), 1:100 (IP, IF) |
| WAVE1                          | Abcam          | ab272916         | 1:1000 (WB)                 |
| RAC1                           | Abcam          | ab180683         | 1:2000 (WB)                 |
| JNK                            | Abcam          | ab179461         | 1:1000 (WB)                 |
| p-JNK (pT183 + Y185)           | Abcam          | ab179461         | 1:1000 (WB)                 |
| CAMK2A                         | Abcam          | ab92332          | 1:20000 (WB)                |
| p-CAMK2A (Thr286)              | Abcam/ABclonal | ab124880/ AP0255 | 1:2000 (WB)                 |
| Histone H3                     | Abcam          | ab1791           | 1:2000 (WB)                 |
| YY1                            | Abcam          | ab109228         | 1:5000 (WB)                 |
| Arp2                           | Abcam          | ab128934         | 1:5000 (WB)                 |
| MAP2                           | Abcam          | ab32454          | 1:5000 (WB), 1:100 (IF)     |
| GAPDH                          | Abcam          | ab8245           | 1:5000 (WB)                 |
| Goat anti-rabbit IgG-HRP       | Abcam          | ab205718         | 1:10000 (WB)                |
| goat anti-mouse IgG-HRP        | Abcam          | ab205719         | 1:10000 (WB)                |
| Cy3 goat Anti-rabbit IgG (H+L) | Abcam          | ab6939           | 1:500 (IF)                  |

**Supplementary Table S5.** The concentration of Wnt5a in the blood of control and schizophrenia patients.

| Control | n        | 36       | Schizophrenia | n        | 48       |
|---------|----------|----------|---------------|----------|----------|
|         | Mean     | 22023.42 |               | Mean     | 9186.80  |
|         | SE       | 2043.35  |               | SE       | 713.30   |
|         | Median   | 18840.93 |               | Median   | 10264.39 |
|         | SD       | 12260.12 |               | SD       | 4941.88  |
|         | Minimum  | 2123.92  |               | Minimum  | 644.61   |
|         | Maximum  | 57874.52 |               | Maximum  | 18986.01 |
|         | Range    | 55750.60 |               | Range    | 18341.40 |
|         | IQR      | 18499.99 |               | IQR      | 9395.42  |
|         | Skewness | 0.52     |               | Skewness | -0.093   |
|         | Kurtosis | 0.45     |               | Kurtosis | -1.15    |

SD: Standard deviation; SE: Standard error, IQR: Interquartile range.

**Supplementary Table S6.** The concentration of RAC1 in the blood of control and schizophrenia patients.

| <b>Control</b> | <b>n</b> | <b>36</b> | <b>Schizophrenia</b> | <b>n</b> | <b>48</b> |
|----------------|----------|-----------|----------------------|----------|-----------|
|                | Mean     | 42800.44  |                      | Mean     | 19779.49  |
|                | SE       | 7324.85   |                      | SE       | 6306.64   |
|                | Median   | 36520.65  |                      | Median   | 7715.00   |
|                | SD       | 43949.12  |                      | SD       | 43693.68  |
|                | Minimum  | 4415.80   |                      | Minimum  | 2732.80   |
|                | Maximum  | 284963.00 |                      | Maximum  | 232698.00 |
|                | Range    | 280547.20 |                      | Range    | 229965.20 |
|                | IQR      | 8411.00   |                      | IQR      | 4266.95   |
|                | Skewness | 5.01      |                      | Skewness | 4.26      |
|                | Kurtosis | 28.07     |                      | Kurtosis | 18.12     |

SD: Standard deviation; SE: Standard error, IQR: Interquartile range.

**Supplementary Table S7.** The concentration of WAVE1 in the blood of control and schizophrenia patients.

| <b>Control</b> | <b>n</b> | <b>36</b> | <b>Schizophrenia</b> | <b>n</b> | <b>48</b> |
|----------------|----------|-----------|----------------------|----------|-----------|
|                | Mean     | 136152.09 |                      | Mean     | 67856.49  |
|                | SE       | 13745.44  |                      | SE       | 20321.71  |
|                | Median   | 131440.50 |                      | Median   | 25435.05  |
|                | SD       | 82472.64  |                      | SD       | 140792.91 |
|                | Minimum  | 9528.40   |                      | Minimum  | 4284.30   |
|                | Maximum  | 472233.50 |                      | Maximum  | 759105.20 |
|                | Range    | 462705.10 |                      | Range    | 754820.90 |
|                | IQR      | 67356.15  |                      | IQR      | 22916.93  |
|                | Skewness | 1.72      |                      | Skewness | 3.83      |
|                | Kurtosis | 7.05      |                      | Kurtosis | 14.89     |

SD: Standard deviation; SE: Standard error, IQR: Interquartile range.

**Supplementary Table S8.** The concentration of Arp2 in the blood of control and schizophrenia patients.

| <b>Control</b> | <b>n</b> | <b>36</b> | <b>Schizophrenia</b> | <b>n</b> | <b>48</b> |
|----------------|----------|-----------|----------------------|----------|-----------|
|                | Mean     | 7216.01   |                      | Mean     | 5909.18   |
|                | SE       | 401.43    |                      | SE       | 150.27    |
|                | Median   | 8271.68   |                      | Median   | 5994.48   |
|                | SD       | 2408.58   |                      | SD       | 1041.07   |
|                | Minimum  | 681.06    |                      | Minimum  | 3457.94   |
|                | Maximum  | 9978.75   |                      | Maximum  | 8008.11   |
|                | Range    | 9297.69   |                      | Range    | 4550.17   |
|                | IQR      | 3259.16   |                      | IQR      | 1434.71   |
|                | Skewness | -1.25     |                      | Skewness | -0.21     |
|                | Kurtosis | 0.55      |                      | Kurtosis | -0.35     |

SD: Standard deviation; SE: Standard error, IQR: Interquartile range.

**Supplementary Table S9.** The concentration of ERVWE1 in the blood of control and schizophrenia patients.

| Control  | <i>n</i> | 36       | Schizophrenia | <i>n</i> | 48       |
|----------|----------|----------|---------------|----------|----------|
| Mean     |          | 1436.67  | Mean          |          | 8986.73  |
| SE       |          | 275.66   | SE            |          | 1581.54  |
| Median   |          | 960.82   | Median        |          | 4764.14  |
| SD       |          | 1653.97  | SD            |          | 10957.22 |
| Minimum  |          | 629.18   | Minimum       |          | 864.21   |
| Maximum  |          | 10166.55 | Maximum       |          | 37913.18 |
| Range    |          | 9537.37  | Range         |          | 37048.97 |
| IQR      |          | 551.00   | IQR           |          | 5982.00  |
| Skewness |          | 4.59     | Skewness      |          | 1.69     |
| Kurtosis |          | 23.40    | Kurtosis      |          | 1.43     |

SD: Standard deviation; SE: Standard error, IQR: Interquartile range.

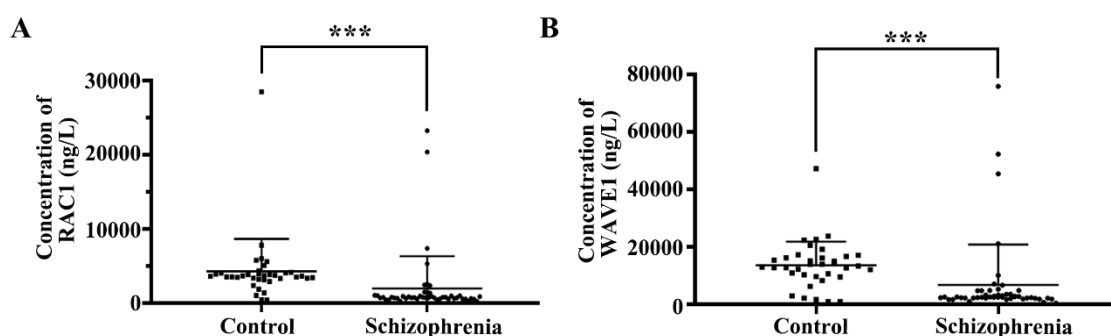

**Supplementary Figure S1.** (A, B) The concentration of RAC1 and WAVE1 in the control groups (*n* = 36) and the schizophrenia patients (*n* = 48). \*\*\* *p* < 0.001.

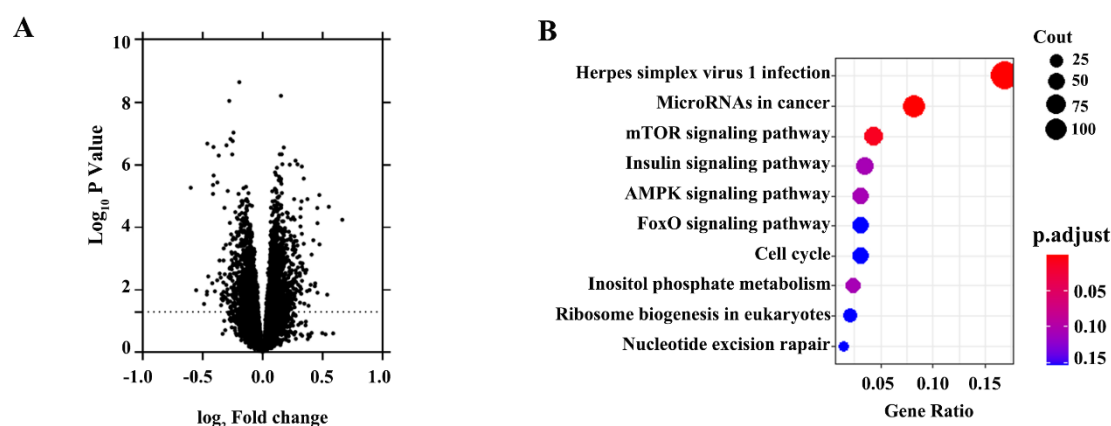

**Supplementary Figure S2.** The expression of Arp2 in schizophrenia patients according to bioinformatics. (A) The volcano plot of gene expression profile data and 255 differentially expressed genes identified using R software. (B) GO, and KEGG analyses of the differentially expressed genes indicated enrichment in the herpes simplex virus I infection, microRNAs in cancer, mTOR signaling pathway, etc.

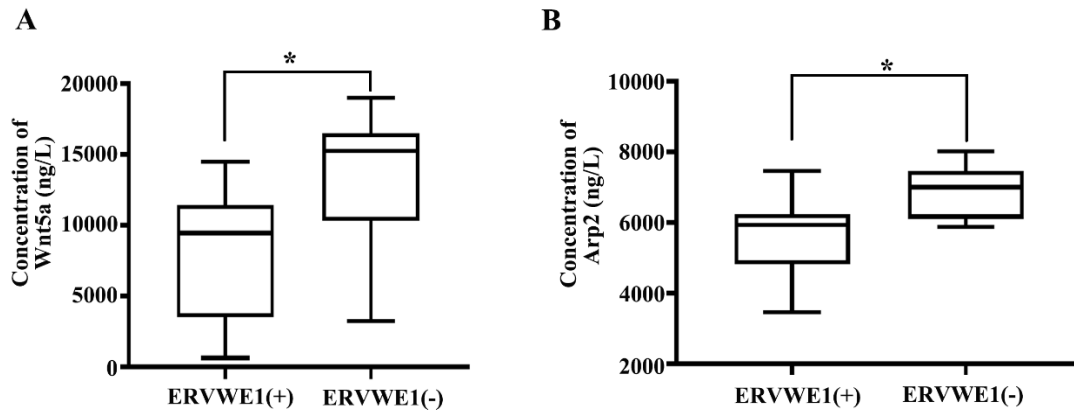

**Supplementary Figure S3 (A, B)** The concentration of Wnt5a and Arp2 in the ERVWE1-positive schizophrenia (ERVWE1 (+), n = 37) and the ERVWE1-negative schizophrenia (ERVWE1 (-), n = 11) groups., \* p<0.05.

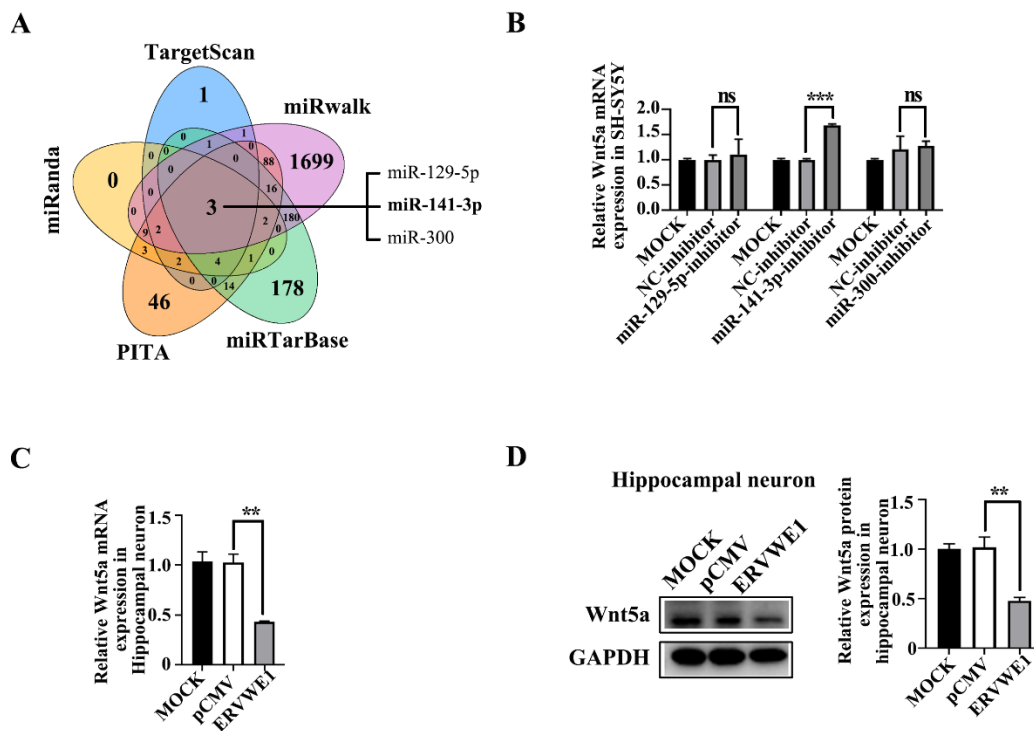

**Supplementary Figure S4.** Wnt5a was a target of miR-141-3p. (A) Targetscan, miRanda, PITA, miRTarBase and miRwalk were used to predict the miRNA regulating Wnt5a, the results showed that miR-129-5p, miR-141-3p, and miR-300 might regulate the expression of Wnt5a. (B) Knockout of miR-141-3p increased the mRNA level of Wnt5a. (C) Decreased mRNA level of Wnt5a was detected using RT-qPCR in rat hippocampal neurons. (D) ERVWE1 down-regulated the protein level of Wnt5a in rat hippocampal neurons. \*\*\*p<0.001, \*\*p<0.01, ns p>0.05.

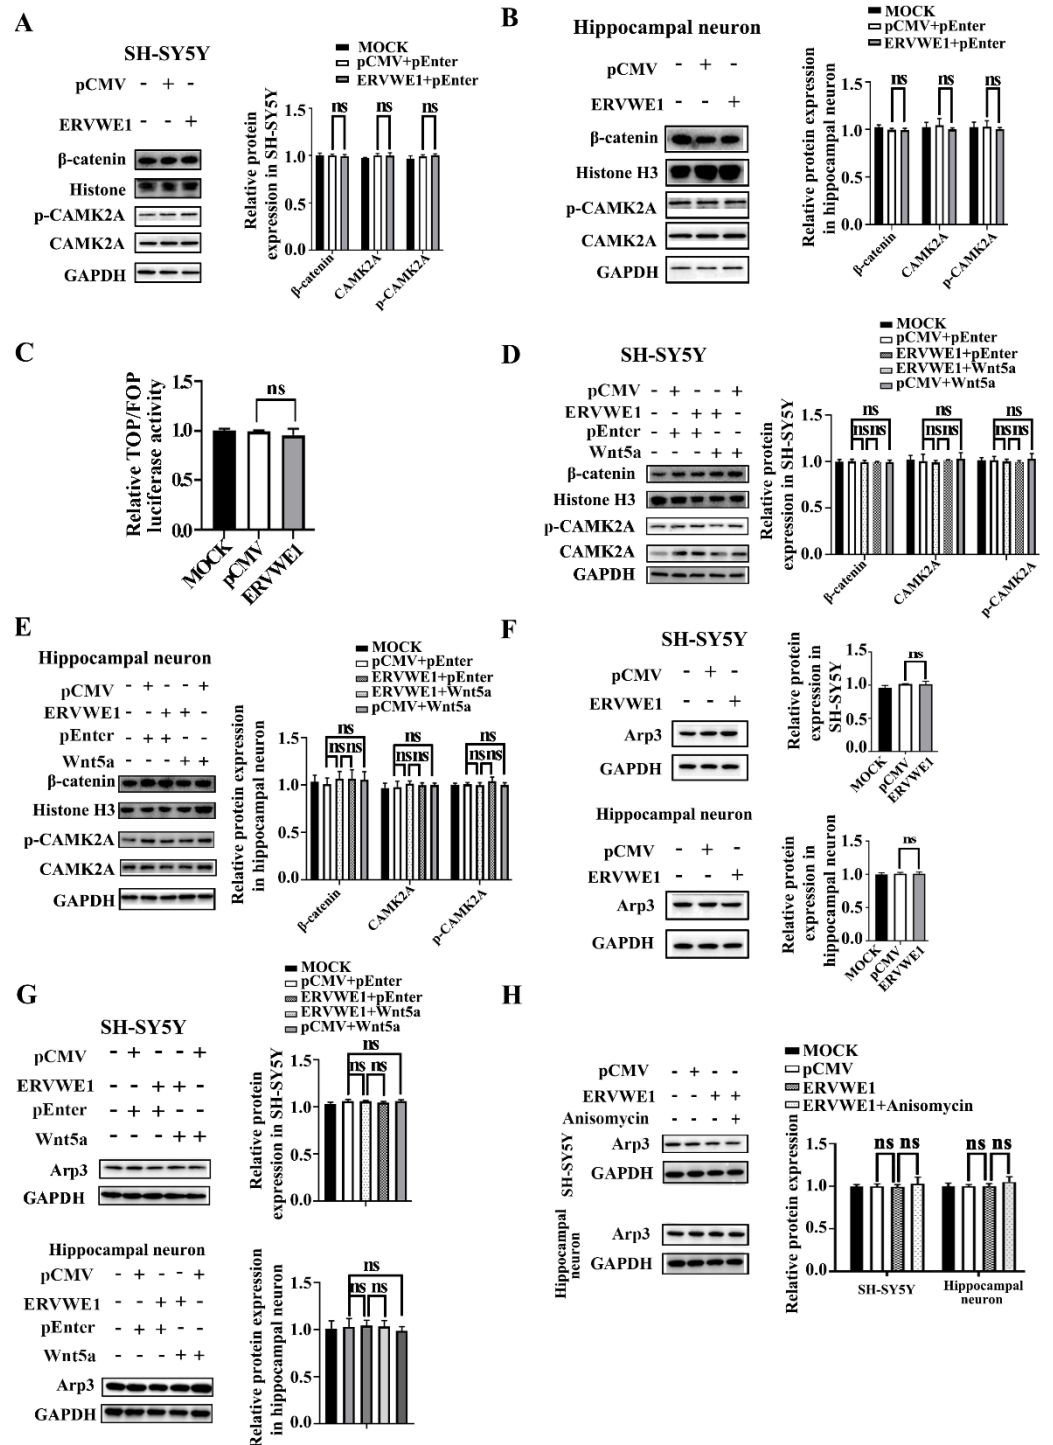

**Supplementary Figure S5.** ERVWE1 had no effect on Arp3 expression, nor on Wnt/ $\beta$ -catenin or Wnt/CAMK2A signaling pathways. (A, B) ERVWE1 did not affect the expression of  $\beta$ -catenin, Histone H3, p-CAMK2A, and CAMK2A in SH-SY5Y cells and rat hippocampal neurons. (C) ERVWE1 had no effect on TOP/FOP reporter activity in SH-SY5Y cells with ERVWE1. A renilla transfection control normalized all results. (D, E) The levels of  $\beta$ -catenin, Histone H3, p-CAMK2A, CAMK2A had no significant change in SH-SY5Y cells and rat hippocampal neurons. (F) No significant changes were noted in the protein level of Arp3 in SH-SY5Y cells and rat hippocampal neurons. (G) The levels of Arp3 had no significant change in SH-SY5Y cells and rat hippocampal neurons. (H) SH-SY5Y cells and rat hippocampal neurons were co-transfected with ERVWE1 and the JNK activator anisomycin, and the Arp3 protein had no significant change. ns  $p > 0.05$ .

**A**

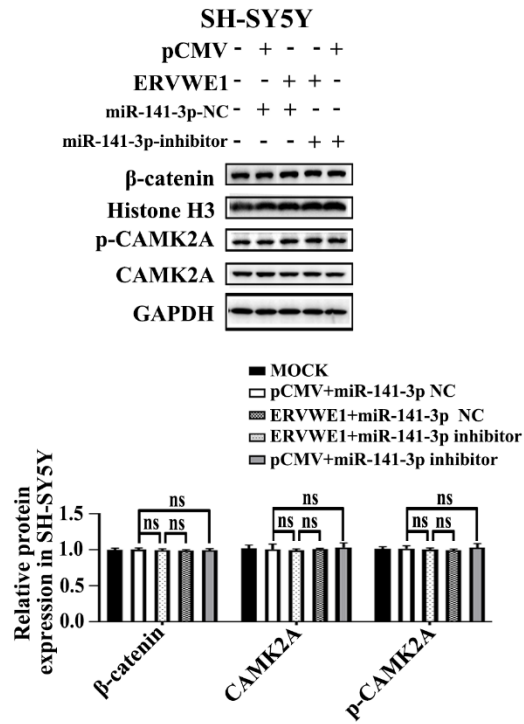

**B**

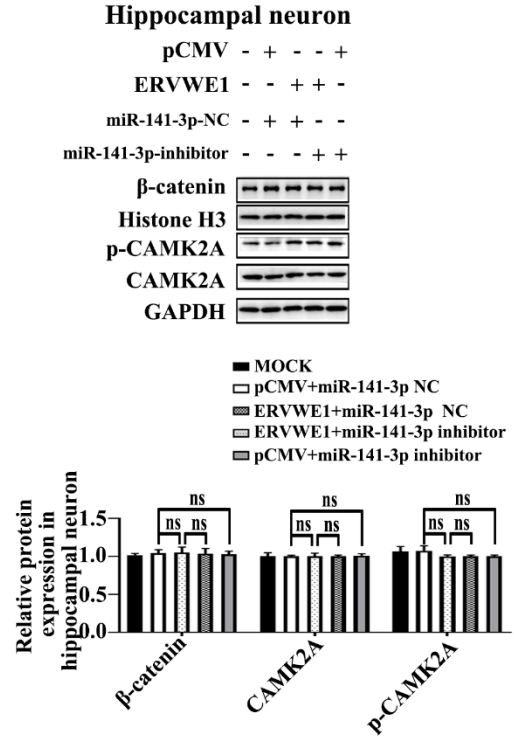

**Supplementary Figure S6.** ERVWE1 and miR-141-3p did not affect the expression of Wnt/ $\beta$ -catenin nor Wnt/CAMK2A signaling pathways. (A, B) SH-SY5Y cells and hippocampus neurons were co-transfected with ERVWE1, miR-141-3p inhibitor or their corresponding controls, and the levels of  $\beta$ -catenin, Histone H3, p-CAMK2A, CAMK2A were unchanged. ns  $p > 0.05$ .
